# Supplementary material for: College openings in the United States increase mobility and COVID-19 incidence
Source: PubMed Central journal article supplement (PMC9423614; doi:10.1371/journal.pone.0272820), 2022-08-29
Supplement: pone.0272820.s002.pdf [file pone.0272820.s002.pdf]

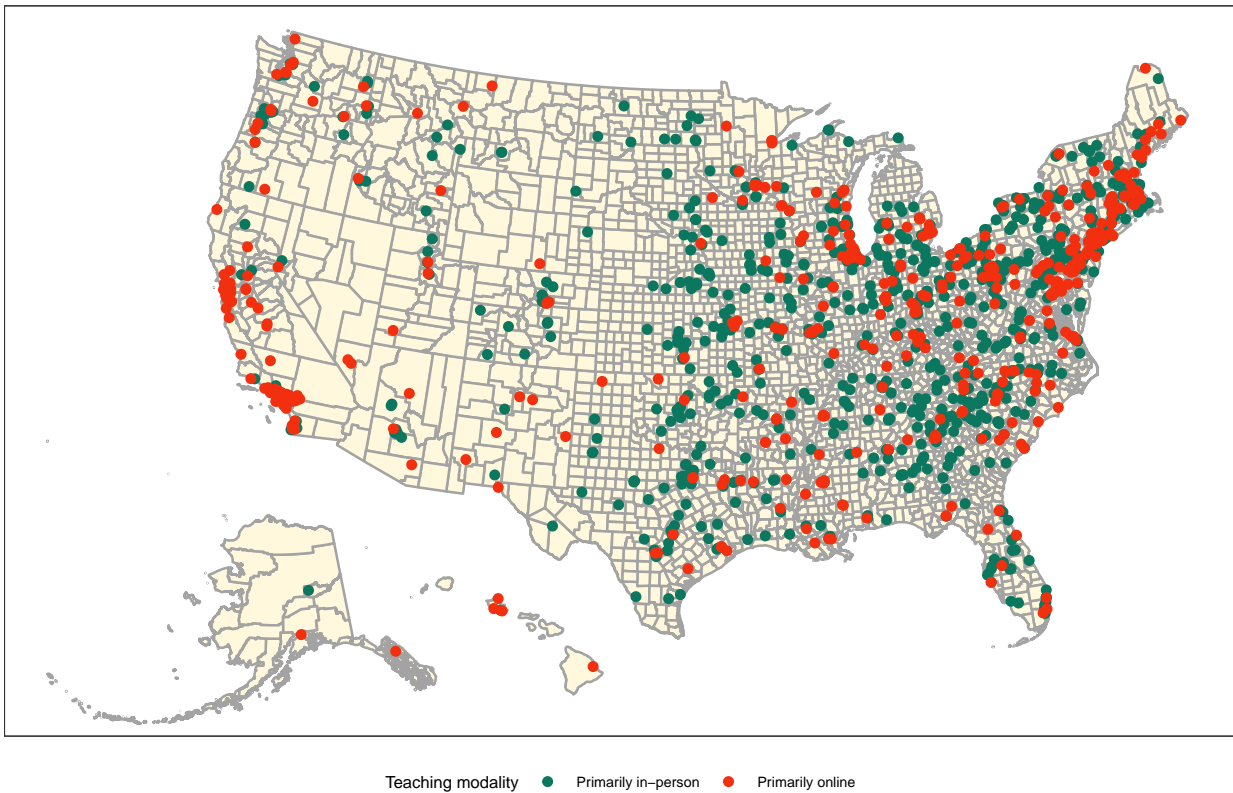

Figure 2: **Geographic distribution of colleges and universities in sample by teaching modality.** Colleges and universities are more prevalent in the eastern half of the United States, while colleges in the western half were more likely to reopen for online teaching. Source: TIGRIS and authors' analysis.
