# Supplementary material for: College openings in the United States increase mobility and COVID-19 incidence
Source: PubMed Central journal article supplement (PMC9423614; doi:10.1371/journal.pone.0272820), 2022-08-29
Supplement: pone.0272820.s004.pdf [file pone.0272820.s004.pdf]

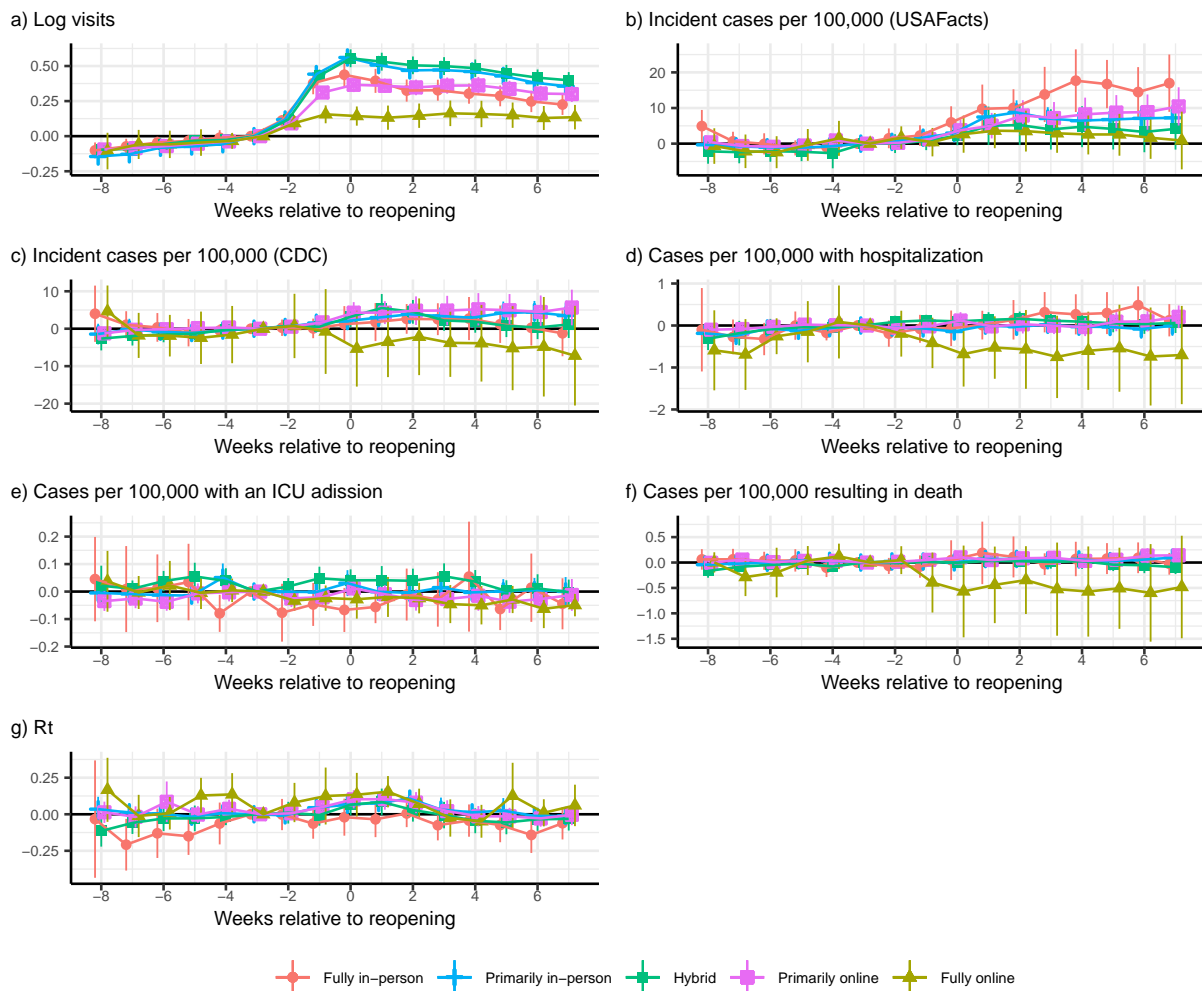

Figure 4: **Teaching modality-specific event studies.** On-campus mobility increased for all teaching modalities (a), while COVID-19 incidence rose for “Fully in-person” ( $\chi^2(8) = 30.16, p < 0.001$ ), “Primarily in-person” ( $\chi^2(8) = 27.79, p < 0.001$ ), and “Primarily online” ( $\chi^2(8) = 21.25, p = 0.007$ ) teaching modalities (b). CDC data (c) indicated that there were increases in COVID-19 incidence for “Hybrid” reopenings ( $\chi^2(8) = 26.52, p < 0.001$ ). Hospitalization rates rose following “Fully in-person” ( $\chi^2(8) = 16.03, p = 0.042$ ) reopenings (d). ICU admissions increased following reopening for “Hybrid” ( $\chi^2(8) = 21.43, p = 0.006$ ) reopenings (e). Deaths did not increase for any reopening modality (f).  $R_t$  was significantly different following reopening for “Primarily in-person” ( $\chi^2(8) = 23.52, p = 0.003$ ), “Hybrid” ( $\chi^2(8) = 25.66, p = 0.001$ ), and “Primarily online” ( $\chi^2(8) = 25.82, p = 0.001$ ) reopenings (g).
