# Supplementary material for: College openings in the United States increase mobility and COVID-19 incidence
Source: PubMed Central journal article supplement (PMC9423614; doi:10.1371/journal.pone.0272820), 2022-08-29
Supplement: pone.0272820.s005.pdf [file pone.0272820.s005.pdf]

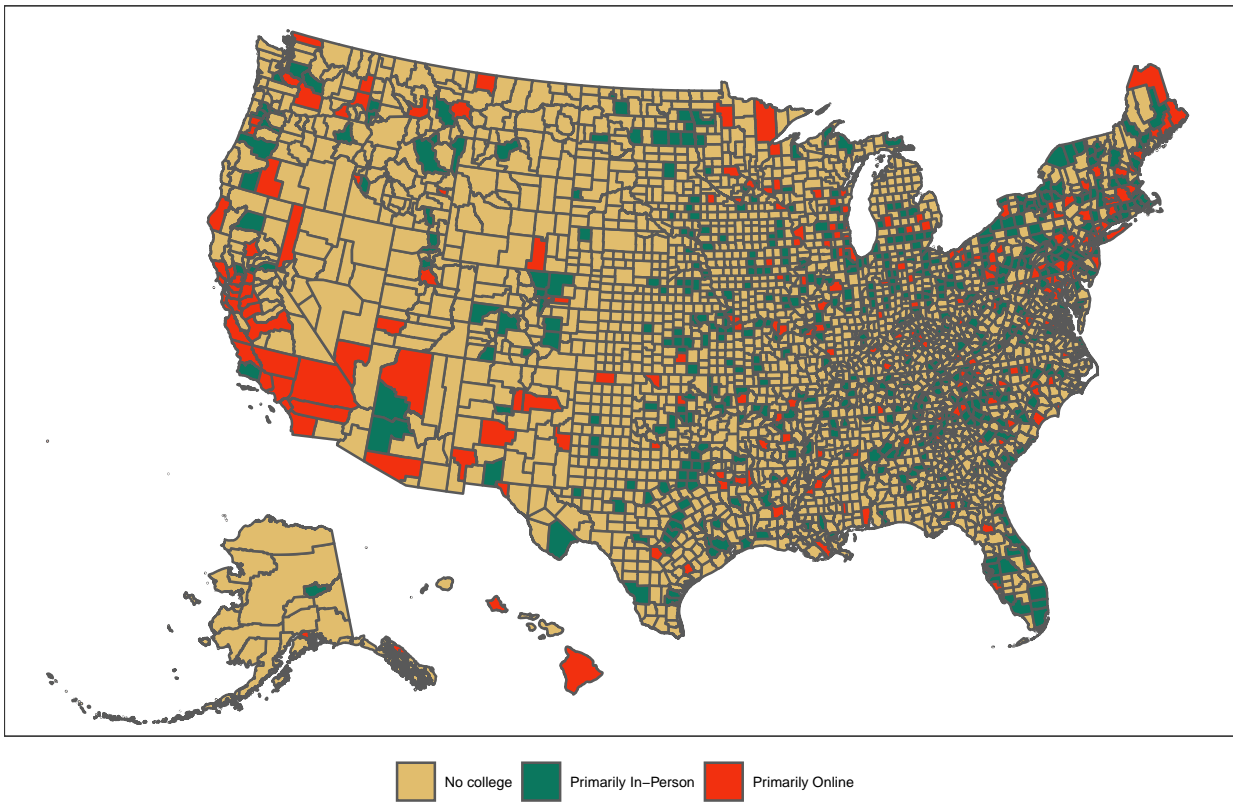

Figure 5: **Geographic distribution of teaching assignments.** Counties were assigned on the basis of the earliest and, if necessary, largest college or university in each county. Source: TIGRIS and authors' analysis.
