# Supplementary material for: College openings in the United States increase mobility and COVID-19 incidence
Source: PubMed Central journal article supplement (PMC9423614; doi:10.1371/journal.pone.0272820), 2022-08-29
Supplement: pone.0272820.s008.pdf [file pone.0272820.s008.pdf]

Table 1: Teaching modalities across counties

| Teaching modality (# counties) | Coarse modality |        | Fine modality   |                     |        |                  |              |
|--------------------------------|-----------------|--------|-----------------|---------------------|--------|------------------|--------------|
|                                | In-person       | Online | Fully In Person | Primarily In Person | Hybrid | Primarily Online | Fully Online |
| <b>Single-Campus counties</b>  |                 |        |                 |                     |        |                  |              |
| In-person (393)                | 1.00            | 0.00   | 0.08            | 0.58                | 0.35   | 0.00             | 0.00         |
| Online (136)                   | 0.00            | 1.00   | 0.00            | 0.00                | 0.00   | 0.88             | 0.12         |
| Fully In Person (31)           | 1.00            | 0.00   | 1.00            | 0.00                | 0.00   | 0.00             | 0.00         |
| Primarily In Person (226)      | 1.00            | 0.00   | 0.00            | 1.00                | 0.00   | 0.00             | 0.00         |
| Hybrid (136)                   | 1.00            | 0.00   | 0.00            | 0.00                | 1.00   | 0.00             | 0.00         |
| Primarily Online (119)         | 0.00            | 1.00   | 0.00            | 0.00                | 0.00   | 1.00             | 0.00         |
| Fully Online (17)              | 0.00            | 1.00   | 0.00            | 0.00                | 0.00   | 0.00             | 1.00         |
| <b>Multi-Campus counties</b>   |                 |        |                 |                     |        |                  |              |
| In-person (159)                | 0.78            | 0.22   | 0.04            | 0.39                | 0.36   | 0.16             | 0.06         |
| Online (98)                    | 0.34            | 0.66   | 0.02            | 0.14                | 0.19   | 0.52             | 0.13         |
| Fully In Person (6)            | 0.88            | 0.12   | 0.44            | 0.29                | 0.14   | 0.08             | 0.04         |
| Primarily In Person (80)       | 0.82            | 0.18   | 0.03            | 0.60                | 0.19   | 0.14             | 0.04         |
| Hybrid (73)                    | 0.73            | 0.27   | 0.01            | 0.16                | 0.56   | 0.20             | 0.07         |
| Primarily Online (85)          | 0.35            | 0.65   | 0.02            | 0.15                | 0.19   | 0.56             | 0.09         |
| Fully Online (13)              | 0.28            | 0.72   | 0.01            | 0.08                | 0.19   | 0.30             | 0.42         |

Source—Authors’ analysis of C2I data.

Notes—Values are the row fraction of campuses in each county with the teaching modality indicated by the column header.

Row label indicates the teaching modality assignment of the county.
