# Supplementary material for: College openings in the United States increase mobility and COVID-19 incidence
Source: PubMed Central journal article supplement (PMC9423614; doi:10.1371/journal.pone.0272820), 2022-08-29
Supplement: pone.0272820.s009.pdf [file pone.0272820.s009.pdf]

Table 2: Summary statistics on the sample.

|                                 | No college        | Primarily in-person |                   | Primarily online  |                   |
|---------------------------------|-------------------|---------------------|-------------------|-------------------|-------------------|
|                                 |                   | Before              | After             | Before            | After             |
| Log visitors                    | 4.17 (0.558)      | 4.54 (0.852)        | 4.95 (0.760)      | 4.27 (0.896)      | 4.64 (0.870)      |
| Visitors                        | 99.9 (62.8)       | 165.0<br>(171.4)    | 218.4<br>(199.7)  | 134.0<br>(147.9)  | 176.6<br>(178.5)  |
| Daily new cases per 100,000...  |                   |                     |                   |                   |                   |
| ...from USAFacts                | 20.7 (54.8)       | 13.5 (49.6)         | 21.6 (33.1)       | 13.0 (19.6)       | 19.1 (39.3)       |
| ...from CDC                     | 20.9 (34.5)       | 12.3 (14.9)         | 21.1 (23.4)       | 12.6 (14.6)       | 19.4 (25.3)       |
| ...resulting in hospitalization | 1.156 (3.80)      | 0.742 (1.39)        | 0.949 (1.68)      | 0.761 (1.27)      | 0.847 (1.53)      |
| ...resulting in ICU admission   | 0.1191<br>(1.222) | 0.0794<br>(0.415)   | 0.0905<br>(0.473) | 0.0905<br>(0.308) | 0.0734<br>(0.311) |
| ...resulting in death           | 0.483<br>(2.548)  | 0.226<br>(0.729)    | 0.375<br>(1.067)  | 0.237<br>(0.861)  | 0.321<br>(1.057)  |
| $R_t$                           | 1.39 (1.269)      | 1.21 (0.637)        | 1.11 (0.617)      | 1.18 (0.840)      | 1.10 (0.410)      |
| Exposure ('0000s)               | —                 | 1.68 (1.65)         | 1.77 (1.70)       | 1.33 (1.38)       | 1.41 (1.44)       |

Source—Authors' analysis of C2I data on college reopening, SafeGraph mobility data, and COVID-19 case and mortality data.
