# Supplementary material for: College openings in the United States increase mobility and COVID-19 incidence
Source: PubMed Central journal article supplement (PMC9423614; doi:10.1371/journal.pone.0272820), 2022-08-29
Supplement: pone.0272820.s010.pdf [file pone.0272820.s010.pdf]

Table 3: Event study coefficients

|           | Log visitors   | Daily new cases per 100,000 from USAFacts | Daily new cases per 100,000 from CDC | Daily new cases per 100,000 resulting in hospitalization | Daily new cases per 100,000 resulting in ICU admission | Daily new cases per 100,000 resulting in death | Rt             |
|-----------|----------------|-------------------------------------------|--------------------------------------|----------------------------------------------------------|--------------------------------------------------------|------------------------------------------------|----------------|
| All       |                |                                           |                                      |                                                          |                                                        |                                                |                |
| -8        | -0.108 (0.009) | -0.457 (0.666)                            | -0.671 (0.696)                       | -0.163 (0.058)                                           | -0.005 (0.013)                                         | -0.044 (0.026)                                 | -0.008 (0.026) |
| -7        | -0.095 (0.007) | -1.101 (0.579)                            | -0.255 (0.648)                       | -0.153 (0.051)                                           | -0.008 (0.009)                                         | -0.013 (0.026)                                 | -0.024 (0.02)  |
| -6        | -0.066 (0.007) | -1.119 (0.551)                            | -0.377 (0.433)                       | -0.054 (0.043)                                           | -0.004 (0.009)                                         | -0.01 (0.023)                                  | 0.011 (0.026)  |
| -5        | -0.051 (0.006) | -1.098 (0.492)                            | -0.532 (0.39)                        | -0.042 (0.04)                                            | 0.007 (0.011)                                          | 0.028 (0.023)                                  | -0.02 (0.018)  |
| -4        | -0.038 (0.005) | -0.693 (0.682)                            | -0.068 (0.313)                       | -0.027 (0.038)                                           | 0.022 (0.013)                                          | 0.003 (0.022)                                  | 0.008 (0.016)  |
| -3        | —              | —                                         | —                                    | —                                                        | —                                                      | —                                              | —              |
| -2        | 0.105 (0.006)  | 0.107 (0.486)                             | 0.546 (0.314)                        | -0.03 (0.036)                                            | -0.006 (0.01)                                          | 0.004 (0.023)                                  | 0.002 (0.015)  |
| -1        | 0.369 (0.013)  | 0.857 (0.533)                             | 1.019 (0.554)                        | -0.022 (0.035)                                           | 0.005 (0.01)                                           | 0.006 (0.022)                                  | 0.028 (0.015)  |
| 0         | 0.456 (0.017)  | 2.628 (0.674)                             | 2.507 (0.706)                        | -0.028 (0.048)                                           | 0.024 (0.011)                                          | 0.008 (0.032)                                  | 0.075 (0.018)  |
| 1         | 0.431 (0.017)  | 5.118 (1.283)                             | 3.572 (0.872)                        | -0.018 (0.053)                                           | 0.013 (0.012)                                          | 0.039 (0.031)                                  | 0.081 (0.021)  |
| 2         | 0.408 (0.017)  | 6.574 (1.575)                             | 3.921 (0.953)                        | 0.013 (0.068)                                            | 0.003 (0.012)                                          | 0.05 (0.033)                                   | 0.068 (0.021)  |
| 3         | 0.413 (0.018)  | 5.65 (1.659)                              | 3.099 (0.985)                        | 0.006 (0.073)                                            | 0.014 (0.013)                                          | 0.026 (0.039)                                  | 0.005 (0.025)  |
| 4         | 0.405 (0.017)  | 6.099 (1.738)                             | 2.945 (1.091)                        | -0.023 (0.075)                                           | 0.011 (0.014)                                          | 0.021 (0.04)                                   | -0.019 (0.022) |
| 5         | 0.376 (0.017)  | 6.178 (1.809)                             | 2.854 (1.191)                        | 0.011 (0.081)                                            | -0.009 (0.013)                                         | 0.002 (0.039)                                  | -0.012 (0.025) |
| 6         | 0.341 (0.016)  | 6.033 (1.855)                             | 2.64 (1.251)                         | -0.003 (0.089)                                           | 0 (0.014)                                              | 0.035 (0.048)                                  | -0.034 (0.019) |
| 7         | 0.327 (0.016)  | 6.793 (1.934)                             | 2.662 (1.391)                        | 0.04 (0.093)                                             | -0.004 (0.017)                                         | 0.033 (0.049)                                  | -0.024 (0.022) |
| In-Person |                |                                           |                                      |                                                          |                                                        |                                                |                |
| -8        | -0.119 (0.01)  | -0.937 (0.91)                             | -1.195 (1.021)                       | -0.195 (0.083)                                           | 0.005 (0.02)                                           | -0.087 (0.038)                                 | -0.03 (0.034)  |
| -7        | -0.108 (0.008) | -1.479 (0.763)                            | -0.566 (0.942)                       | -0.181 (0.075)                                           | -0.001 (0.012)                                         | -0.042 (0.035)                                 | -0.032 (0.025) |
| -6        | -0.068 (0.007) | -1.459 (0.751)                            | -0.787 (0.621)                       | -0.072 (0.066)                                           | 0.009 (0.012)                                          | -0.02 (0.03)                                   | -0.019 (0.025) |
| -5        | -0.053 (0.006) | -1.578 (0.65)                             | -0.98 (0.51)                         | -0.075 (0.055)                                           | 0.016 (0.014)                                          | 0.013 (0.031)                                  | -0.031 (0.022) |
| -4        | -0.041 (0.005) | -1.516 (0.946)                            | -0.276 (0.369)                       | -0.054 (0.044)                                           | 0.036 (0.017)                                          | -0.023 (0.029)                                 | -0.005 (0.017) |
| -3        | —              | —                                         | —                                    | —                                                        | —                                                      | —                                              | —              |
| -2        | 0.118 (0.007)  | 0.105 (0.677)                             | 0.555 (0.359)                        | -0.002 (0.047)                                           | 0.002 (0.012)                                          | -0.001 (0.031)                                 | -0.003 (0.019) |
| -1        | 0.433 (0.016)  | 1.098 (0.665)                             | 0.993 (0.731)                        | 0.007 (0.049)                                            | 0.015 (0.013)                                          | 0.01 (0.028)                                   | 0.015 (0.019)  |
| 0         | 0.551 (0.021)  | 2.596 (0.723)                             | 2.388 (0.831)                        | -0.045 (0.055)                                           | 0.029 (0.016)                                          | 0.003 (0.034)                                  | 0.056 (0.021)  |
| 1         | 0.512 (0.021)  | 5.972 (1.716)                             | 3.841 (1.081)                        | 0.041 (0.061)                                            | 0.019 (0.015)                                          | 0.06 (0.04)                                    | 0.069 (0.024)  |
| 2         | 0.479 (0.021)  | 6.901 (1.863)                             | 3.96 (1.024)                         | 0.051 (0.067)                                            | 0.016 (0.015)                                          | 0.052 (0.04)                                   | 0.067 (0.023)  |
| 3         | 0.478 (0.021)  | 5.813 (1.893)                             | 2.742 (0.992)                        | 0.064 (0.077)                                            | 0.031 (0.016)                                          | 0.024 (0.041)                                  | 0.006 (0.029)  |
| 4         | 0.465 (0.021)  | 6.119 (1.944)                             | 2.325 (1.095)                        | 0.025 (0.077)                                            | 0.021 (0.015)                                          | 0.04 (0.046)                                   | -0.017 (0.024) |
| 5         | 0.431 (0.02)   | 6.032 (2.006)                             | 2.36 (1.192)                         | 0.007 (0.084)                                            | 0.001 (0.015)                                          | -0.005 (0.045)                                 | -0.016 (0.03)  |
| 6         | 0.391 (0.02)   | 5.761 (2.024)                             | 2.229 (1.217)                        | -0.014 (0.09)                                            | 0.012 (0.017)                                          | 0.005 (0.051)                                  | -0.034 (0.022) |
| 7         | 0.37 (0.02)    | 6.341 (2.075)                             | 1.975 (1.366)                        | 0.011 (0.094)                                            | -0.001 (0.018)                                         | 0.002 (0.052)                                  | -0.03 (0.023)  |
| Online    |                |                                           |                                      |                                                          |                                                        |                                                |                |
| -8        | -0.097 (0.017) | 0.458 (0.838)                             | -0.516 (0.811)                       | -0.156 (0.09)                                            | -0.028 (0.017)                                         | 0.002 (0.027)                                  | 0.031 (0.035)  |
| -7        | -0.079 (0.014) | -0.668 (0.918)                            | -0.384 (0.751)                       | -0.148 (0.078)                                           | -0.024 (0.016)                                         | 0.017 (0.044)                                  | -0.015 (0.033) |
| -6        | -0.068 (0.014) | -0.957 (0.764)                            | -0.32 (0.629)                        | -0.052 (0.058)                                           | -0.03 (0.015)                                          | -0.014 (0.04)                                  | 0.076 (0.061)  |
| -5        | -0.052 (0.013) | -0.467 (0.705)                            | -0.161 (0.667)                       | 0.002 (0.064)                                            | -0.008 (0.016)                                         | 0.034 (0.033)                                  | 0.013 (0.026)  |
| -4        | -0.036 (0.008) | 1.02 (0.653)                              | 0.111 (0.596)                        | 0.019 (0.07)                                             | -0.003 (0.015)                                         | 0.045 (0.03)                                   | 0.051 (0.029)  |
| -3        | —              | —                                         | —                                    | —                                                        | —                                                      | —                                              | —              |
| -2        | 0.092 (0.009)  | 0.374 (0.515)                             | 0.576 (0.639)                        | -0.074 (0.055)                                           | -0.026 (0.014)                                         | 0.02 (0.025)                                   | 0.015 (0.022)  |
| -1        | 0.28 (0.019)   | 0.86 (0.971)                              | 1.33 (0.922)                         | -0.058 (0.06)                                            | -0.019 (0.014)                                         | 0.007 (0.038)                                  | 0.058 (0.024)  |
| 0         | 0.322 (0.022)  | 3.386 (1.28)                              | 3.085 (1.393)                        | 0.025 (0.101)                                            | 0.008 (0.012)                                          | 0.03 (0.071)                                   | 0.107 (0.028)  |
| 1         | 0.314 (0.021)  | 4.583 (1.621)                             | 3.335 (1.484)                        | -0.087 (0.091)                                           | -0.009 (0.015)                                         | -0.002 (0.051)                                 | 0.11 (0.033)   |
| 2         | 0.308 (0.023)  | 7.147 (1.995)                             | 3.912 (1.827)                        | -0.035 (0.119)                                           | -0.027 (0.017)                                         | 0.041 (0.055)                                  | 0.076 (0.033)  |
| 3         | 0.321 (0.023)  | 6.509 (2.105)                             | 3.805 (1.876)                        | -0.088 (0.113)                                           | -0.026 (0.016)                                         | 0.029 (0.079)                                  | 0.013 (0.034)  |
| 4         | 0.321 (0.025)  | 7.409 (2.219)                             | 4.093 (2.075)                        | -0.094 (0.119)                                           | -0.015 (0.024)                                         | -0.026 (0.07)                                  | -0.02 (0.032)  |
| 5         | 0.299 (0.024)  | 7.862 (2.328)                             | 3.731 (2.107)                        | 0.025 (0.125)                                            | -0.032 (0.018)                                         | 0.001 (0.062)                                  | 0.002 (0.03)   |
| 6         | 0.268 (0.023)  | 7.874 (2.352)                             | 3.343 (2.187)                        | 0.013 (0.136)                                            | -0.027 (0.02)                                          | 0.062 (0.085)                                  | -0.026 (0.027) |
| 7         | 0.266 (0.024)  | 9.132 (2.574)                             | 4.081 (2.362)                        | 0.106 (0.148)                                            | -0.014 (0.026)                                         | 0.074 (0.082)                                  | 0 (0.033)      |

Source—Authors’ analysis of C2I data, SafeGraph mobility data, and CDC COVID-19 case data.

Notes—Estimates are aggregated treatment effects from generalized difference-in-differences regressions for each week, relative to reopening. Standard error, clustered on county, reported in round brackets. Each column in each panel is from a separate specification.
