# Supplementary material for: College openings in the United States increase mobility and COVID-19 incidence
Source: PubMed Central journal article supplement (PMC9423614; doi:10.1371/journal.pone.0272820), 2022-08-29
Supplement: pone.0272820.s011.pdf [file pone.0272820.s011.pdf]

Table 4: Difference-in-difference regressions demonstrating the effect of reopening college campuses on mobility and COVID-19 incidence and sequelae.

|                                                   | Log visitors                                 | Daily new cases per 100,000 from USAFacts      | Daily new cases per 100,000 from CDC           | Daily new hospitalized cases per 100,000       | Daily new cases in ICU per 100,000            | Daily new deaths per 100,000                   | Rt                                             |
|---------------------------------------------------|----------------------------------------------|------------------------------------------------|------------------------------------------------|------------------------------------------------|-----------------------------------------------|------------------------------------------------|------------------------------------------------|
| Baseline                                          | 0.322 (0.015)<br>[0.293, 0.351]<br>{p<0.001} | 4.885 (1.004)<br>[2.918, 6.853]<br>{p<0.001}   | 2.729 (0.772)<br>[1.215, 4.242]<br>{p<0.001}   | 0.023 (0.052)<br>[-0.079, 0.125]<br>{p=0.661}  | 0.020 (0.010)<br>[-0.001, 0.040]<br>{p=0.057} | 0.027 (0.031)<br>[-0.034, 0.088]<br>{p=0.391}  | 0.056 (0.016)<br>[0.025, 0.087]<br>{p<0.001}   |
| In-person                                         | 0.388 (0.019)<br>[0.351, 0.424]<br>{p<0.001} | 5.215 (1.129)<br>[3.002, 7.428]<br>{p<0.001}   | 2.677 (0.826)<br>[1.059, 4.295]<br>{p=0.001}   | 0.029 (0.055)<br>[-0.079, 0.137]<br>{p=0.593}  | 0.022 (0.014)<br>[-0.005, 0.048]<br>{p=0.106} | 0.036 (0.029)<br>[-0.020, 0.092]<br>{p=0.208}  | 0.053 (0.018)<br>[0.018, 0.087]<br>{p=0.003}   |
| Online                                            | 0.225 (0.017)<br>[0.191, 0.259]<br>{p<0.001} | 5.032 (1.417)<br>[2.254, 7.810]<br>{p<0.001}   | 2.958 (1.535)<br>[-0.050, 5.967]<br>{p=0.054}  | 0.027 (0.084)<br>[-0.137, 0.192]<br>{p=0.745}  | 0.013 (0.011)<br>[-0.010, 0.035]<br>{p=0.271} | 0.005 (0.069)<br>[-0.130, 0.139]<br>{p=0.944}  | 0.062 (0.027)<br>[0.009, 0.115]<br>{p=0.022}   |
| In-person = Online, $\chi^2(2)$ (p-value)         | 166.04 (<0.001)                              | 0.05 (0.830)                                   | 0.03 (0.867)                                   | 0 (0.979)                                      | 0.33 (0.568)                                  | 0.19 (0.667)                                   | 0.23 (0.635)                                   |
| Week(s) relative to reopening                     |                                              |                                                |                                                |                                                |                                               |                                                |                                                |
| Week prior                                        | 0.276 (0.014)<br>[0.249, 0.303]<br>{p<0.001} | 1.720 (0.790)<br>[0.172, 3.268]<br>{p=0.029}   | 0.714 (0.758)<br>[-0.772, 2.200]<br>{p=0.346}  | -0.023 (0.065)<br>[-0.151, 0.104]<br>{p=0.718} | 0.016 (0.017)<br>[-0.017, 0.049]<br>{p=0.335} | -0.013 (0.037)<br>[-0.085, 0.059]<br>{p=0.723} | 0.045 (0.016)<br>[0.013, 0.077]<br>{p=0.006}   |
| Weeks 0-1                                         | 0.350 (0.018)<br>[0.315, 0.386]<br>{p<0.001} | 4.736 (0.903)<br>[2.966, 6.506]<br>{p<0.001}   | 2.734 (0.925)<br>[0.921, 4.548]<br>{p=0.003}   | -0.025 (0.073)<br>[-0.168, 0.119]<br>{p=0.734} | 0.030 (0.022)<br>[-0.013, 0.073]<br>{p=0.178} | 0.005 (0.040)<br>[-0.074, 0.084]<br>{p=0.906}  | 0.095 (0.017)<br>[0.062, 0.128]<br>{p<0.001}   |
| Weeks 2-3                                         | 0.318 (0.019)<br>[0.281, 0.354]<br>{p<0.001} | 6.975 (1.513)<br>[4.009, 9.940]<br>{p<0.001}   | 3.205 (1.093)<br>[1.062, 5.348]<br>{p=0.003}   | 0.008 (0.090)<br>[-0.168, 0.183]<br>{p=0.932}  | 0.020 (0.023)<br>[-0.025, 0.064]<br>{p=0.386} | 0.019 (0.044)<br>[-0.068, 0.106]<br>{p=0.666}  | 0.054 (0.020)<br>[0.015, 0.093]<br>{p=0.007}   |
| Weeks 4+                                          | 0.269 (0.017)<br>[0.235, 0.303]<br>{p<0.001} | 7.139 (1.744)<br>[3.721, 10.557]<br>{p<0.001}  | 2.470 (1.298)<br>[-0.074, 5.014]<br>{p=0.057}  | 0.005 (0.100)<br>[-0.190, 0.200]<br>{p=0.960}  | 0.011 (0.023)<br>[-0.035, 0.056]<br>{p=0.646} | 0.004 (0.052)<br>[-0.097, 0.105]<br>{p=0.941}  | -0.005 (0.017)<br>[-0.039, 0.028]<br>{p=0.755} |
| Equality across weeks 0-4+, $\chi^2(2)$ (p-value) | 165.99 (<0.001)                              | 23.05 (<0.001)                                 | 10.41 (0.015)                                  | 0.63 (0.889)                                   | 4.36 (0.225)                                  | 1.53 (0.677)                                   | 42.95 (<0.001)                                 |
| Terciles of COVID-19 exposure                     |                                              |                                                |                                                |                                                |                                               |                                                |                                                |
| 1st tercile                                       | 0.280 (0.018)<br>[0.244, 0.316]<br>{p<0.001} | 3.887 (0.952)<br>[2.021, 5.753]<br>{p<0.001}   | 2.215 (0.694)<br>[0.854, 3.575]<br>{p=0.001}   | 0.092 (0.059)<br>[-0.023, 0.207]<br>{p=0.117}  | 0.016 (0.013)<br>[-0.010, 0.042]<br>{p=0.226} | 0.064 (0.028)<br>[0.009, 0.119]<br>{p=0.023}   | 0.085 (0.039)<br>[0.009, 0.162]<br>{p=0.028}   |
| 2nd tercile                                       | 0.272 (0.018)<br>[0.236, 0.308]<br>{p<0.001} | 5.206 (1.266)<br>[2.726, 7.687]<br>{p<0.001}   | 2.108 (1.162)<br>[-0.169, 4.385]<br>{p=0.070}  | 0.044 (0.082)<br>[-0.117, 0.204]<br>{p=0.592}  | 0.018 (0.016)<br>[-0.013, 0.049]<br>{p=0.263} | -0.012 (0.064)<br>[-0.136, 0.113]<br>{p=0.854} | 0.019 (0.020)<br>[-0.020, 0.058]<br>{p=0.351}  |
| 3rd tercile                                       | 0.381 (0.026)<br>[0.330, 0.431]<br>{p<0.001} | 5.953 (1.487)<br>[3.039, 8.867]<br>{p<0.001}   | 4.303 (1.576)<br>[1.215, 7.392]<br>{p=0.006}   | -0.026 (0.072)<br>[-0.168, 0.116]<br>{p=0.724} | 0.019 (0.019)<br>[-0.018, 0.055]<br>{p=0.315} | 0.045 (0.037)<br>[-0.027, 0.118]<br>{p=0.218}  | 0.068 (0.020)<br>[0.028, 0.107]<br>{p<0.001}   |
| Equality across terciles, $\chi^2(2)$ (p-value)   | 52.71 (<0.001)                               | 8.9 (0.012)                                    | 1.72 (0.424)                                   | 2.81 (0.246)                                   | 0.02 (0.991)                                  | 1.3 (0.521)                                    | 10.95 (0.004)                                  |
| Terciles of college student share                 |                                              |                                                |                                                |                                                |                                               |                                                |                                                |
| 1st tercile                                       | 0.193 (0.014)<br>[0.165, 0.222]<br>{p<0.001} | 2.085 (1.480)<br>[-0.815, 4.986]<br>{p=0.159}  | -0.077 (0.902)<br>[-1.846, 1.691]<br>{p=0.932} | -0.089 (0.087)<br>[-0.260, 0.082]<br>{p=0.306} | 0.009 (0.017)<br>[-0.024, 0.042]<br>{p=0.608} | 0.001 (0.040)<br>[-0.076, 0.078]<br>{p=0.980}  | 0.023 (0.025)<br>[-0.026, 0.072]<br>{p=0.351}  |
| 2nd tercile                                       | 0.287 (0.020)<br>[0.247, 0.327]<br>{p<0.001} | 2.060 (1.533)<br>[-0.944, 5.064]<br>{p=0.179}  | -0.220 (1.077)<br>[-2.331, 1.892]<br>{p=0.839} | 0.035 (0.081)<br>[-0.124, 0.194]<br>{p=0.664}  | 0.021 (0.012)<br>[-0.002, 0.044]<br>{p=0.075} | 0.004 (0.072)<br>[-0.136, 0.145]<br>{p=0.953}  | 0.023 (0.024)<br>[-0.024, 0.070]<br>{p=0.331}  |
| 3rd tercile                                       | 0.463 (0.026)<br>[0.411, 0.515]<br>{p<0.001} | 11.434 (1.214)<br>[9.054, 13.813]<br>{p<0.001} | 9.018 (1.598)<br>[5.885, 12.151]<br>{p<0.001}  | 0.148 (0.070)<br>[0.010, 0.287]<br>{p=0.035}   | 0.020 (0.021)<br>[-0.021, 0.061]<br>{p=0.335} | 0.077 (0.039)<br>[0.001, 0.154]<br>{p=0.047}   | 0.126 (0.026)<br>[0.076, 0.177]<br>{p<0.001}   |
| Equality across terciles, $\chi^2(2)$ (p-value)   | 243.4 (<0.001)                               | 98.83 (<0.001)                                 | 27.48 (<0.001)                                 | 5.31 (0.070)                                   | 0.43 (0.805)                                  | 1.95 (0.376)                                   | 28.72 (<0.001)                                 |

Source—Authors’ analysis of C2I data on college reopening, SafeGraph mobility data, and COVID-19 case and mortality data. Notes—Estimates are aggregated treatment effects from generalized difference-in-differences regressions for the first 28 days following reopening. “Primarily in-person” includes “Fully in-person” and “Hybrid”; “Primarily online” includes “Fully online”. Exposure is the 7-day COVID-19 incidence in source counties for each college two weeks prior to reopening, weighted by the change in movement to the campus from each county. Column titles indicate the dependent variable; each panel is a separate specification. Z-statistics in parentheses following point estimates, 95% confidence intervals in square brackets, and p-values in curly brackets.
