# Supplementary material for: College openings in the United States increase mobility and COVID-19 incidence
Source: PubMed Central journal article supplement (PMC9423614; doi:10.1371/journal.pone.0272820), 2022-08-29
Supplement: pone.0272820.s012.pdf [file pone.0272820.s012.pdf]

Table 5: Age-specific difference-in-differences demonstrates that the increase in incidence of COVID-19 was isolated to people between 10 and 29 years of age, which encompasses college-age individuals

|             | Daily new cases per<br>100,000                 | Daily new<br>hospitalized cases per<br>100,000 | Daily new cases in<br>ICU per 100,000          | Daily new deaths per<br>100,000                |
|-------------|------------------------------------------------|------------------------------------------------|------------------------------------------------|------------------------------------------------|
| 0 - 9       | -0.293 (0.361)<br>[-1.000, 0.414]<br>{p=0.417} | 0.008 (0.017)<br>[-0.026, 0.042]<br>{p=0.631}  | 0.007 (0.006)<br>[-0.006, 0.019]<br>{p=0.309}  | -0.003 (0.002)<br>[-0.006, 0.000]<br>{p=0.091} |
| 10 - 19     | 8.027 (1.278)<br>[5.522, 10.531]<br>{p<0.001}  | 0.084 (0.034)<br>[0.018, 0.149]<br>{p=0.013}   | 0.004 (0.003)<br>[-0.001, 0.010]<br>{p=0.132}  | -0.001 (0.002)<br>[-0.004, 0.003]<br>{p=0.644} |
| 20 - 29     | 7.378 (1.395)<br>[4.643, 10.113]<br>{p<0.001}  | 0.062 (0.053)<br>[-0.042, 0.167]<br>{p=0.241}  | -0.003 (0.012)<br>[-0.026, 0.021]<br>{p=0.816} | 0.005 (0.006)<br>[-0.006, 0.016]<br>{p=0.337}  |
| 30 - 49     | -0.129 (0.909)<br>[-1.912, 1.653]<br>{p=0.887} | 0.029 (0.064)<br>[-0.096, 0.154]<br>{p=0.645}  | 0.012 (0.010)<br>[-0.009, 0.032]<br>{p=0.254}  | 0.021 (0.011)<br>[-0.001, 0.042]<br>{p=0.059}  |
| 50 - 69     | 0.283 (0.650)<br>[-0.991, 1.558]<br>{p=0.663}  | 0.036 (0.094)<br>[-0.149, 0.220]<br>{p=0.704}  | 0.044 (0.023)<br>[-0.001, 0.088]<br>{p=0.054}  | 0.026 (0.039)<br>[-0.050, 0.103]<br>{p=0.500}  |
| 70+         | 0.746 (0.893)<br>[-1.003, 2.496]<br>{p=0.403}  | 0.024 (0.242)<br>[-0.450, 0.497]<br>{p=0.922}  | 0.063 (0.063)<br>[-0.060, 0.186]<br>{p=0.316}  | 0.185 (0.209)<br>[-0.224, 0.594]<br>{p=0.375}  |
| $\chi^2(5)$ | 67.21 (<0.001)                                 | 5.28 (0.382)                                   | 5.15 (0.398)                                   | 7.57 (0.182)                                   |

Source—Authors’ analysis of C2I data, SafeGraph mobility data, and CDC COVID-19 case data.  
Notes—Estimates are aggregated treatment effects from generalized difference-in-differences regressions. Column titles indicate the class of the dependent variable and the row label indicates the age group. Standard errors in parentheses following point estimates, 95% confidence intervals in square brackets, and p-values in curly brackets.  $\chi^2$  tests for equality across age groups are reported in the bottom row.
