# Supplementary material for: College openings in the United States increase mobility and COVID-19 incidence
Source: PubMed Central journal article supplement (PMC9423614; doi:10.1371/journal.pone.0272820), 2022-08-29
Supplement: pone.0272820.s013.pdf [file pone.0272820.s013.pdf]

Table 6: Age-specific means of the dependent variables

|                | Incidence        |                  | Hospitalizations |                | ICU admissions |                | Deaths         |                |
|----------------|------------------|------------------|------------------|----------------|----------------|----------------|----------------|----------------|
|                | Pre-period       | Post-period      | Pre-period       | Post-period    | Pre-period     | Post-period    | Pre-period     | Post-period    |
| USAFacts       | 13.32<br>(40.60) | 21.54<br>(36.10) |                  |                |                |                |                |                |
| CDC (All ages) | 12.39<br>(14.99) | 21.29<br>(24.51) | 0.74<br>(1.33)   | 0.94<br>(1.66) | 0.08<br>(0.38) | 0.09<br>(0.43) | 0.23<br>(0.77) | 0.37<br>(1.09) |
| 0 - 9          | 4.35<br>(11.36)  | 6.48<br>(12.95)  | 0.06<br>(0.81)   | 0.06<br>(0.76) | 0.00<br>(0.16) | 0.00<br>(0.26) | 0.00<br>(0.03) | 0.00<br>(0.02) |
| 10 - 19        | 10.28<br>(16.75) | 22.22<br>(34.32) | 0.08<br>(0.79)   | 0.11<br>(1.02) | 0.01<br>(0.31) | 0.00<br>(0.15) | 0.00<br>(0.04) | 0.00<br>(0.13) |
| 20 - 29        | 19.19<br>(26.81) | 30.22<br>(40.36) | 0.28<br>(1.46)   | 0.25<br>(1.53) | 0.01<br>(0.26) | 0.01<br>(0.52) | 0.01<br>(0.18) | 0.01<br>(0.28) |
| 30 - 49        | 15.44<br>(23.79) | 23.49<br>(33.09) | 0.55<br>(1.97)   | 0.54<br>(2.27) | 0.05<br>(0.56) | 0.04<br>(0.59) | 0.04<br>(0.72) | 0.04<br>(0.55) |
| 50 - 69        | 11.22<br>(15.63) | 19.49<br>(25.58) | 1.07<br>(2.80)   | 1.29<br>(3.33) | 0.14<br>(0.92) | 0.14<br>(0.99) | 0.24<br>(1.46) | 0.29<br>(1.49) |
| 70+            | 10.40<br>(20.34) | 20.42<br>(35.03) | 2.63<br>(6.89)   | 4.03<br>(9.70) | 0.30<br>(2.02) | 0.38<br>(2.65) | 1.49<br>(5.27) | 2.63<br>(8.57) |

Source—Authors' analysis of CDC and USAFacts data.

Notes—Values are the mean and standard deviation (parentheses) for the indicated variable, measured per 100,000 people. Sample restricted to counties with a college.
