# Supplementary material for: College openings in the United States increase mobility and COVID-19 incidence
Source: PubMed Central journal article supplement (PMC9423614; doi:10.1371/journal.pone.0272820), 2022-08-29
Supplement: pone.0272820.s014.pdf [file pone.0272820.s014.pdf]

Table 7: Robustness checks discussed in section 1

|                                                  | Log visitors                                 | Daily new cases per 100,000 from USAFacts | Daily new cases per 100,000 from CDC       | Daily new cases per 100,000 resulting in hospitalization | Daily new cases per 100,000 resulting in ICU admission | Daily new cases per 100,000 resulting in death | Rt                                           |
|--------------------------------------------------|----------------------------------------------|-------------------------------------------|--------------------------------------------|----------------------------------------------------------|--------------------------------------------------------|------------------------------------------------|----------------------------------------------|
| Baseline                                         | 0.322 (0.015)<br>[0.293, 0.351]<br>{p<0.001} | 4.89 (1.00)<br>[2.92, 6.85]<br>{p<0.001}  | 2.73 (0.77)<br>[1.22, 4.24]<br>{p<0.001}   | 0.023 (0.052)<br>[-0.079,0.125]<br>{p=0.661}             | 0.020 (0.010)<br>[-0.001,0.040]<br>{p=0.057}           | 0.027 (0.031)<br>[-0.034,0.088]<br>{p=0.391}   | 0.056 (0.016)<br>[0.025, 0.087]<br>{p<0.001} |
| Colleges only                                    | 0.269 (0.060)<br>[0.152, 0.386]<br>{p<0.001} | 2.51 (1.83)<br>[-1.09, 6.10]<br>{p=0.171} | -3.38 (1.93)<br>[-7.16, 0.40]<br>{p=0.079} | 0.152 (0.092)<br>[-0.029,0.332]<br>{p=0.099}             | 0.098 (0.038)<br>[0.024, 0.172]<br>{p=0.009}           | 0.016 (0.080)<br>[-0.140,0.172]<br>{p=0.840}   | 0.051 (0.039)<br>[-0.025,0.127]<br>{p=0.187} |
| Single campus                                    |                                              | 5.30 (0.85)<br>[3.62, 6.97]<br>{p<0.001}  | 3.17 (0.97)<br>[1.28, 5.07]<br>{p=0.001}   | 0.025 (0.056)<br>[-0.09, 0.14]<br>{p=0.656}              | 0.017 (0.013)<br>[-0.009,0.043]<br>{p=0.197}           | 0.013 (0.043)<br>[-0.072,0.098]<br>{p=0.769}   | 0.069 (0.019)<br>[0.032, 0.106]<br>{p<0.001} |
| Smoothness restrictions (linear trends)          |                                              |                                           |                                            |                                                          |                                                        |                                                |                                              |
| No deviation                                     | [0.355, 0.419]                               | [4.07, 7.93]                              | [1.80, 4.92]                               | [-0.073,0.133]                                           | [-0.006,0.028]                                         | [-0.005,0.094]                                 | [0.032, 0.085]                               |
| Deviation                                        | [0.099, 0.755]                               | [-10.33,20.31]                            | [-8.82,15.37]                              | [-1.351,1.337]                                           | [-0.524,0.551]                                         | [-0.789, 0.85]                                 | [-0.938,1.052]                               |
| Relative magnitude restriction (parallel trends) |                                              |                                           |                                            |                                                          |                                                        |                                                |                                              |
| No deviation                                     | [0.394, 0.459]                               | [2.70, 7.26]                              | [1.73, 4.78]                               | [-0.110,0.100]                                           | [-0.006,0.033]                                         | [-0.025,0.088]                                 | [0.025, 0.09]                                |
| Deviation                                        | [0.212, 0.647]                               | [-4.50, 12.54]                            | [-1.41, 8.24]                              | [-0.772,0.723]                                           | [-0.177,0.213]                                         | [-0.329,0.377]                                 | [-0.294,0.420]                               |

Source—Authors’ analysis of C2I data, SafeGraph mobility data, and CDC COVID-19 case data.

Notes—Estimates are aggregated treatment effects from generalized difference-in-differences regressions for the first 8 weeks following reopening. Column titles indicate the dependent variable; each panel is a separate specification. “Colleges only” restricts the sample to Census Block Groups and counties with a college campus. “Single campus” restricts to counties without a college campus or with only one collect campus. Standard errors in parentheses following point estimates, 95% confidence intervals in square brackets, and p-values in curly brackets. “Smoothness restrictions” bound the effect of deviations from linear trends using the approach in Rambachan and Roth<sup>1</sup>; “No deviation” assumes that linear trends in the pre-period continue into the post-period, while “Deviation” allows for deviations from a linear trend as large as the largest deviation observed in the pre-period. “Relative magnitude restrictions” bound the effect of deviations from a parallel trends assumption, with “no deviation” assuming that parallel trends holds in the post-period, regardless of any differential trends in the pre-period, while “Deviation” allows for a deviation from parallel trends that is as large as the largest deviation from parallel trends observed in the pre-period.
