# Supplementary material for: College openings in the United States increase mobility and COVID-19 incidence
Source: PubMed Central journal article supplement (PMC9423614; doi:10.1371/journal.pone.0272820), 2022-08-29
Supplement: pone.0272820.s015.pdf [file pone.0272820.s015.pdf]

Table 8: Weekly and daily pre-trend tests

|                        | Log visitors    | Daily new cases<br>per 100,000<br>from USAFacts | Daily new cases<br>per 100,000<br>from CDC | Daily new cases<br>per 100,000<br>resulting in<br>hospitalization | Daily new cases<br>per 100,000<br>resulting in ICU<br>admission | Daily new cases<br>per 100,000<br>resulting in<br>death | Rt              |
|------------------------|-----------------|-------------------------------------------------|--------------------------------------------|-------------------------------------------------------------------|-----------------------------------------------------------------|---------------------------------------------------------|-----------------|
| <b>Weekly pre-test</b> |                 |                                                 |                                            |                                                                   |                                                                 |                                                         |                 |
| All                    | 174.69 (<0.001) | 5.93 (0.313)                                    | 3.41 (0.637)                               | 10.54 (0.061)                                                     | 7.35 (0.196)                                                    | 3.85 (0.571)                                            | 6.24 (0.284)    |
| In-person              | 198.88 (<0.001) | 6.46 (0.264)                                    | 4.93 (0.424)                               | 7.42 (0.191)                                                      | 7.71 (0.173)                                                    | 4.91 (0.427)                                            | 3.17 (0.674)    |
| Online                 | 35.1 (<0.001)   | 5.74 (0.333)                                    | 0.58 (0.989)                               | 4.83 (0.436)                                                      | 4.36 (0.498)                                                    | 2.9 (0.716)                                             | 8.06 (0.153)    |
| Fully in-person        | 10.52 (0.062)   | 3.17 (0.674)                                    | 1.35 (0.930)                               | 5.11 (0.403)                                                      | 9 (0.109)                                                       | 7.12 (0.212)                                            | 8.93 (0.112)    |
| Primarily<br>in-person | 105.41 (<0.001) | 4.05 (0.542)                                    | 4.68 (0.456)                               | 11.87 (0.037)                                                     | 5.49 (0.359)                                                    | 3.39 (0.639)                                            | 1.69 (0.890)    |
| Hybrid                 | 95.59 (<0.001)  | 3.37 (0.643)                                    | 3.57 (0.613)                               | 2.11 (0.834)                                                      | 9.81 (0.081)                                                    | 6.07 (0.299)                                            | 2.56 (0.767)    |
| Primarily online       | 56.73 (<0.001)  | 4.68 (0.457)                                    | 1.31 (0.934)                               | 4 (0.550)                                                         | 5.74 (0.332)                                                    | 4.5 (0.480)                                             | 6.35 (0.274)    |
| Fully online           | 1.99 (0.851)    | 5.72 (0.334)                                    | 1.35 (0.930)                               | 3.47 (0.628)                                                      | 3.3 (0.654)                                                     | 8.28 (0.142)                                            | 10.91 (0.053)   |
| Single Campus          |                 | 0.99 (0.963)                                    | 3.88 (0.566)                               | 6.64 (0.249)                                                      | 5.37 (0.372)                                                    | 5 (0.416)                                               | 2.14 (0.829)    |
| Colleges only          | 59.97 (<0.001)  | 13.75 (0.017)                                   | 3.64 (0.603)                               | 7.42 (0.191)                                                      | 3.05 (0.692)                                                    | 3.92 (0.560)                                            | 5.04 (0.411)    |
| <b>Daily pre-test</b>  |                 |                                                 |                                            |                                                                   |                                                                 |                                                         |                 |
| All                    | 857.49 (<0.001) | 36.93 (0.380)                                   | 48.23 (0.068)                              | 49.11 (0.057)                                                     | 49.46 (0.053)                                                   | 26.08 (0.863)                                           | 31.83 (0.622)   |
| In-person              | 788.68 (<0.001) | 43.32 (0.158)                                   | 44.73 (0.126)                              | 36.38 (0.404)                                                     | 48.26 (0.067)                                                   | 38.27 (0.323)                                           | 39.85 (0.263)   |
| Online                 | 409 (<0.001)    | 57.03 (0.011)                                   | 55.04 (0.017)                              | 56.98 (0.011)                                                     | 53.06 (0.026)                                                   | 40.28 (0.248)                                           | 50.52 (0.043)   |
| Fully in-person        | 765.29 (<0.001) | 137.52 (<0.001)                                 | 787.56 (<0.001)                            | 456.16 (<0.001)                                                   | 162.42 (<0.001)                                                 | 228.87 (<0.001)                                         | 128.74 (<0.001) |
| Primarily<br>in-person | 449.1 (<0.001)  | 39.11 (0.290)                                   | 81.98 (<0.001)                             | 56.44 (0.012)                                                     | 48.2 (0.068)                                                    | 52.14 (0.031)                                           | 29.98 (0.709)   |
| Hybrid                 | 625.09 (<0.001) | 44.73 (0.126)                                   | 58.32 (0.008)                              | 57.16 (0.010)                                                     | 41.27 (0.215)                                                   | 65.75 (0.001)                                           | 45.49 (0.110)   |
| Primarily online       | 458.12 (<0.001) | 55.5 (0.015)                                    | 72.92 (<0.001)                             | 91.06 (<0.001)                                                    | 62.6 (0.003)                                                    | 46.46 (0.093)                                           | 46.61 (0.091)   |
| Fully online           | 228.81 (<0.001) | 116.29 (<0.001)                                 | 367 (<0.001)                               | 187.22 (<0.001)                                                   | 46.27 (0.096)                                                   | 227.16 (<0.001)                                         | 263.42 (<0.001) |
| Single Campus          |                 | 33.53 (0.539)                                   | 55.87 (0.014)                              | 45.17 (0.116)                                                     | 62.67 (0.003)                                                   | 25.48 (0.881)                                           | 24.26 (0.914)   |
| Colleges only          | 118.49 (<0.001) | 55.11 (0.017)                                   | 57.69 (0.009)                              | 48.64 (0.062)                                                     | 48.95 (0.059)                                                   | 26.75 (0.840)                                           | 37.78 (0.343)   |

Source—Authors’ analysis of C2I data, SafeGraph mobility data, and CDC COVID-19 case data.

Notes—Values are  $\chi^2$  test statistics for the existence of pre-trends over the period from 7 to 3 weeks before reopening (“weekly” tests) or 56 to 15 days (“daily” tests). P-values reported in curly brackets. Test statistics are robust to clustering on county.
